# Supplementary material
Source: Springer Nature journal article supplement (https://www.springermedizin.de/resource/supplementary/12943_2009_562_MOESM4_ESM.pdf/9554976)

**A** Relative Intensity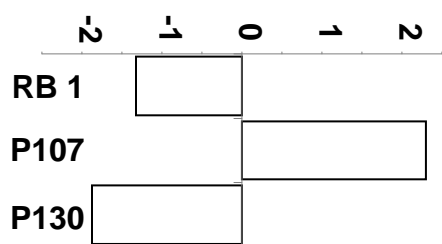**B** Relative Intensity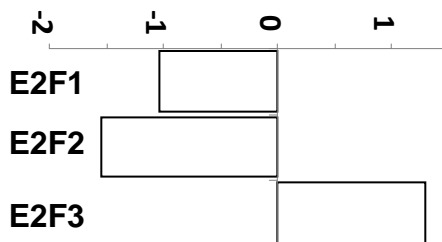**C** Relative Intensity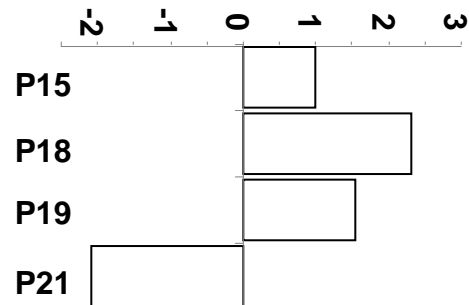**D** Relative Intensity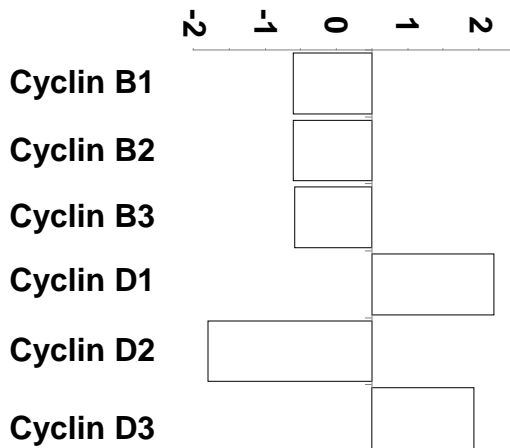**E** Relative Intensity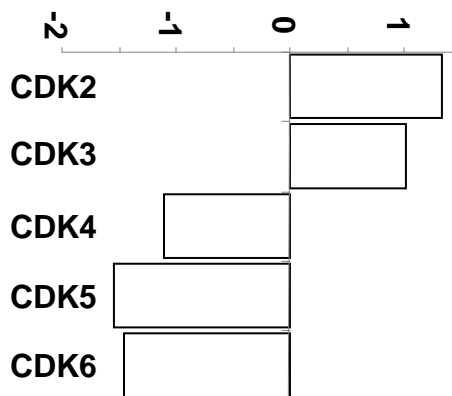

Supplement: MOESM4 [file 9554976]
